# Supplementary material for: A Safe GDNF and GDNF/BDNF Controlled Delivery System Improves Migration in Human Retinal Pigment Epithelial Cells and Survival in Retinal Ganglion Cells: Potential Usefulness in Degenerative Retinal Pathologies
Source: PubMed Central journal article supplement (PMC7827036; doi:10.3390/ph14010050), 2021-01-11
Supplement: pharmaceuticals-14-00050-s001.pdf [file pharmaceuticals-14-00050-s001.pdf]

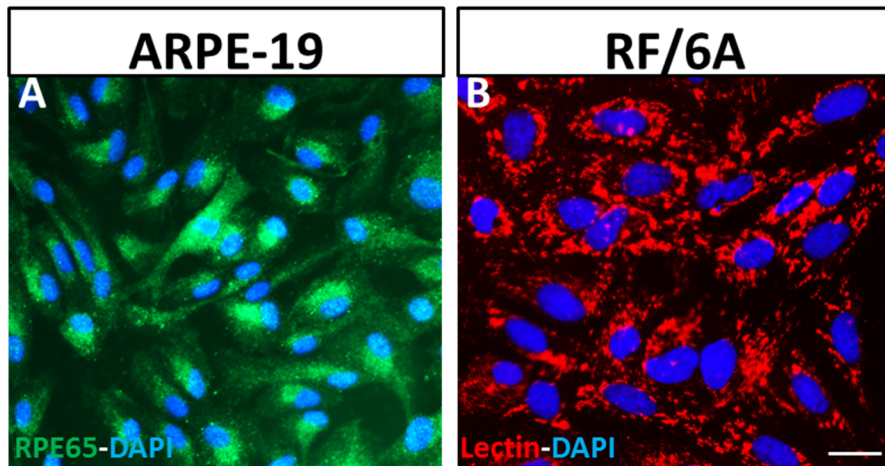

**Figure S1. ARPE-19 and RF/6A cells phenotype in culture.** (A) ARPE-19 cells were positive for RPE65 (green). (B) RF/6A cells were positive for lectin (red). Nuclei were stained with DAPI (blue). Scale bar: 20  $\mu$ m.

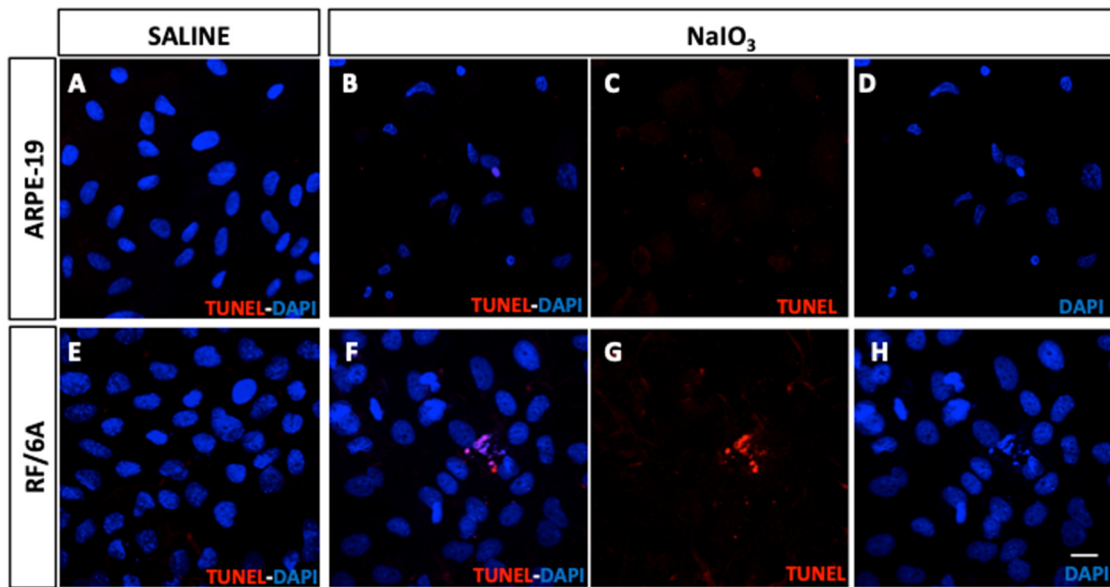

**Figure S2. TUNEL assay in ARPE-19 and RF/6A.** Saline (A and E) and sodium iodate (B-D and F-H) treated ARPE-19 (A-D) and RF/6A cells (E-H). Unmerged images are shown for sodium iodate treated samples to identify TUNEL signal (red, C and G) and DAPI (D and H). Scale bar: 20  $\mu$ m

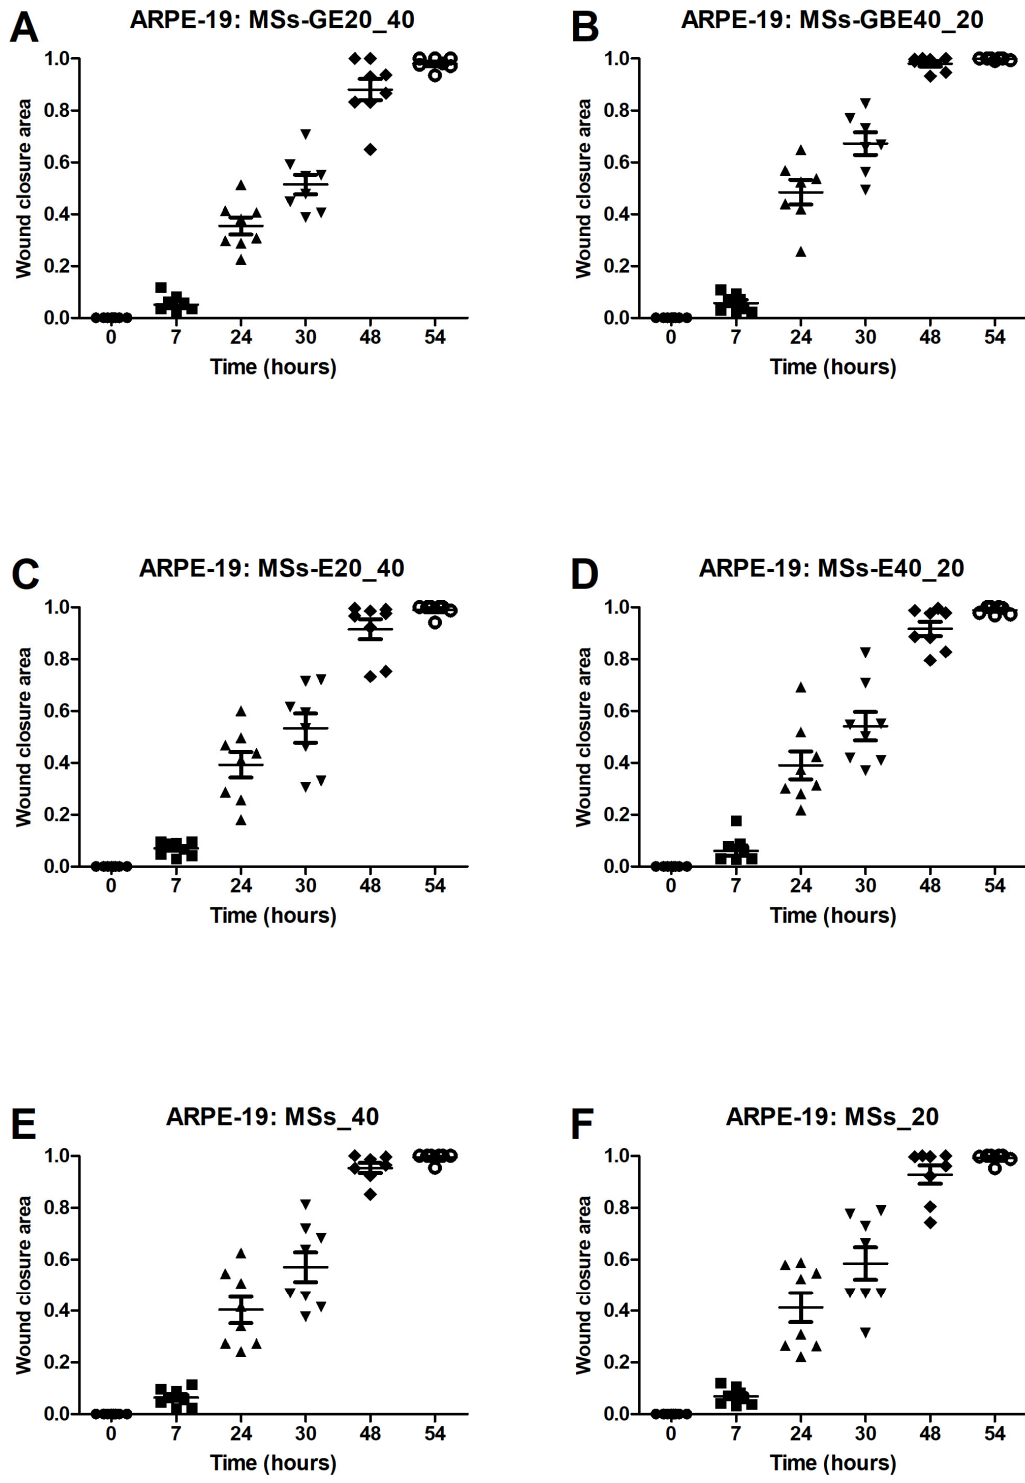

Figure S3. Wound healing assay in ARPE-19 cells. Scatter plot representation of wound closure area pattern in ARPE-19 cells (n=6-8) for the different study groups.

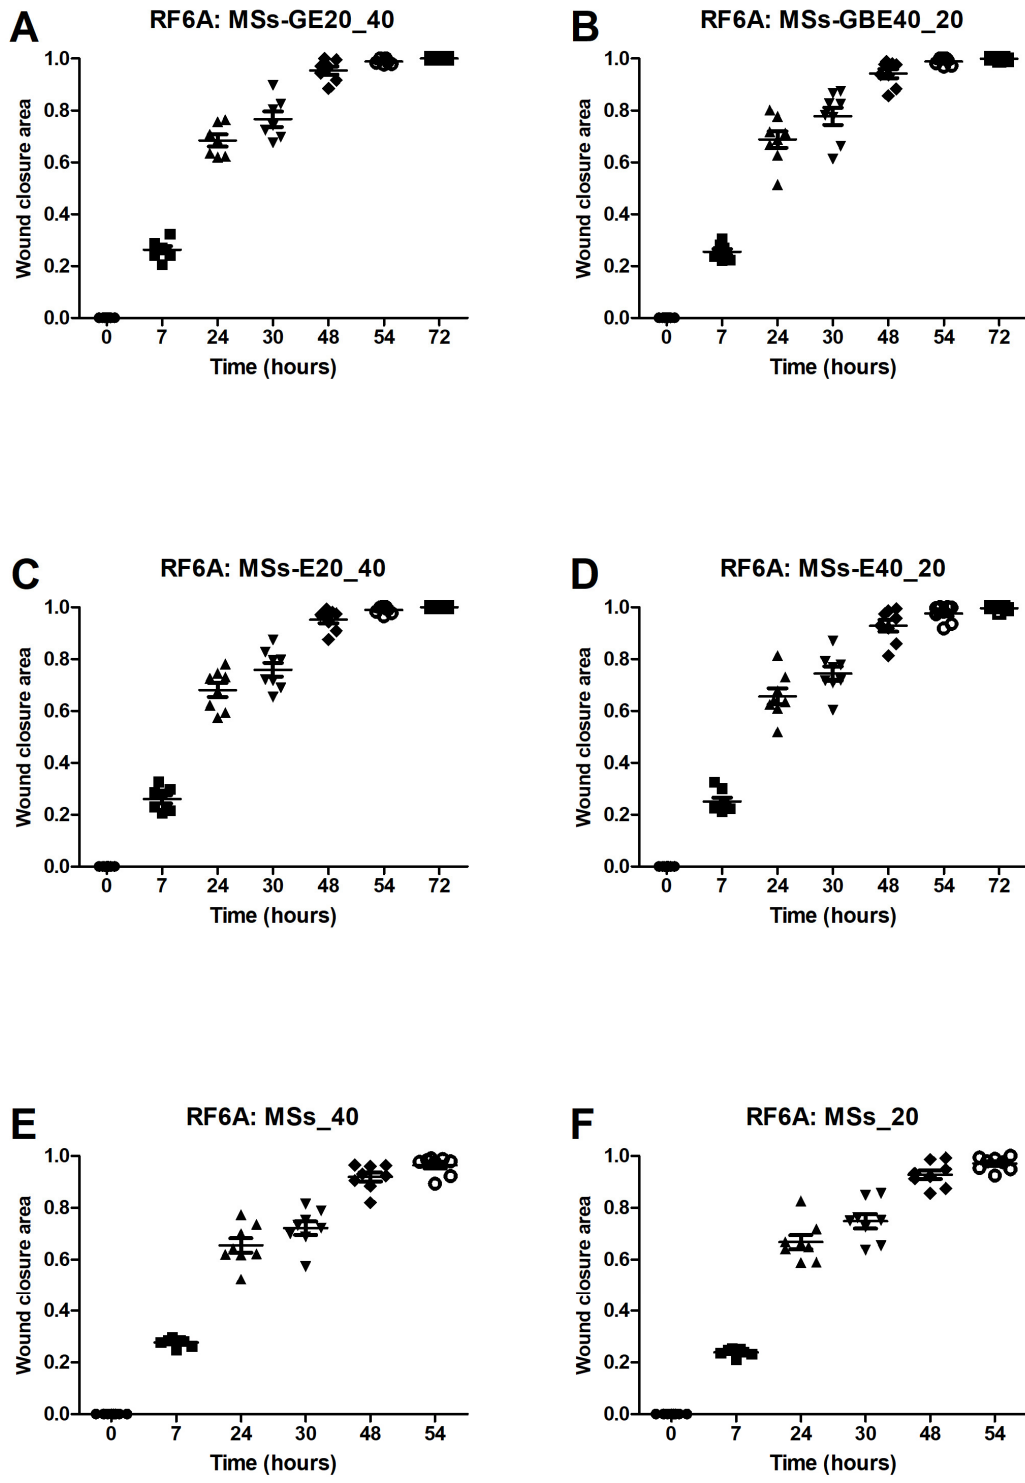

Figure S4. Wound healing assay in RF/6A cells. Scatter plot representation of wound closure area pattern in RF/6A cells (n=7-8) for the different groups of study.
